# Supplementary material for: COVID-19 Associated Contact Restrictions in Germany: Marked Decline in Children’s Outpatient Visits for Infectious Diseases without Increasing Visits for Mental Health Disorders
Source: MDPI journal article supplement (doi:10.3390/children8090728), 2021-08-25
Supplement: s1 [file s1]

## Article

# COVID-19 Associated Contact Restrictions in Germany: Marked Decline in Children's Outpatient Visits for Infectious Diseases without Increasing Visits for Mental Health Disorders

Mara Barschkett<sup>1</sup>, Berthold Koletzko<sup>2</sup>, C. Katharina Spiess<sup>1</sup>
<sup>1</sup> Department of Education and Family, German Institute for Economic Research (DIW), Berlin and Freie Universität Berlin, Germany; mbarschkett@diw.de; kspiess@diw.de

<sup>2</sup> LMU - Ludwig-Maximilians-Universität Munich, Dept. Pediatrics, Dr. von Hauner Children's Hospital, LMU University Hospital, Munich, Germany; berthold.koletzko@med.uni-muenchen.de

\* Correspondence: berthold.koletzko@med.uni-muenchen.de; Prof. Berthold Koletzko, Else Kröner Senior Professor of Pediatrics, LMU - Ludwig-Maximilians-Universität Munich, Dept. Pediatrics, Dr. von Hauner Children's Hospital, LMU University Hospital, Lindwurmstr. 4, 80337 Munich, Germany, Tel: +49 89 44005 2826

**Citation:** Barschkett, M.; Koletzko, B.; Spiess, C.K. COVID-19 Associated Contact Restrictions in Germany: Marked Decline in Children's Outpatient Visits for Infectious Diseases without Increasing Visits for Mental Health Disorders. *Children* **2021**, *8*, 728. <https://doi.org/10.3390/children8090728>

Academic Editor: Benedetto Vitiello

Received: 16 July 2021

Accepted: 20 August 2021

Published: 24 August 2021

**Publisher's Note:** MDPI stays neutral with regard to jurisdictional claims in published maps and institutional affiliations.

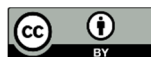

**Copyright:** © 2021 by the authors. Licensee MDPI, Basel, Switzerland. This article is an open access article distributed under the terms and conditions of the Creative Commons Attribution (CC BY) license (<http://creativecommons.org/licenses/by/4.0/>).

## Supplementary Material

**Table S1.** Number of outpatient doctor's visits per child, and frequency of selected diagnoses (ICD 10 codes) during Q2 2019 (control) and Q2 2020 (pandemic) for all 1-12 year old children in Germany with statutory health insurance who presented to a physician's office between January 2019 and June 2020. CI = Confidence Intervals, , OLS = binary Ordinary Least Square model.

| Age                                      | 1-12 years      |                 |                            |
|------------------------------------------|-----------------|-----------------|----------------------------|
| Year                                     | 2019            | 2020            | P<br>CI                    |
|                                          | Raw means       |                 | OLS                        |
| Children                                 | 8,290,904       | 8,499,507       |                            |
| Outpatient visits per child              | 0.7147 ± 0.4970 | 0.5888 ± 0.5240 | < 0.0001<br>(-0.13,-0.13)  |
| Infections                               |                 |                 |                            |
| Infectious and parasitic diseases        | 0.1593 ± 0.3360 | 0.0784 ± 0.2688 | < 0.0001<br>(-0.08,-0.08)  |
| Infectious intestinal diseases           | 0.0341 ± 0.1814 | 0.0091 ± 0.0948 | < 0.0001<br>(-0.03,-0.02)  |
| Diseases of the middle ear and mastoid   | 0.0605 ± 0.2383 | 0.0178 ± 0.1321 | < 0.0001<br>(-0.04,-0.04)  |
| Diseases of the respiratory system       | 0.2827 ± 0.4503 | 0.1380 ± 0.3449 | < 0.0001<br>(-0.15, -0.14) |
| Acute upper respiratory tract infections | 0.1750 ± 0.3800 | 0.0603 ± 0.2381 | < 0.0001<br>(-0.12,-0.11)  |
| Streptococcus Angina                     | 0.0292 ± 0.1683 | 0.0065 ± 0.0806 | < 0.0001                   |

|                                                                         |                 |                 |                            |
|-------------------------------------------------------------------------|-----------------|-----------------|----------------------------|
|                                                                         |                 |                 | (-0.02,-0.02)              |
| <b>Injuries</b>                                                         |                 |                 |                            |
| Injuries                                                                | 0.0436 ± 0.2042 | 0.0362 ± 0.1868 | < 0.0001<br>(-0.01,-0.01)  |
| <b>Chronic physical diseases</b>                                        |                 |                 |                            |
| Diabetes                                                                | 0.0012 ± 0.0350 | 0.0011 ± 0.0337 | < 0.0001<br>(-0.00,- 0.00) |
| Celiac disease                                                          | 0.0014 ± 0.0380 | 0.0012 ± 0.0350 | < 0.0001<br>(-0.00, -0.00) |
| Hay fever                                                               | 0.0321 ± 0.1763 | 0.0304 ± 0.1716 | < 0.0001<br>(-0.00,-0.00)  |
| <b>Mental and Behavioral Disorders</b>                                  |                 |                 |                            |
| All mental and behavioral disorders                                     | 0.1585 ± 0.3652 | 0.1406 ± 0.3476 | < 0.0001<br>(-0.02,-0.02)  |
| Neurotic, stress and somatoform disorders                               | 0.0185 ± 0.1349 | 0.0160 ± 0.1257 | < 0.0001<br>(-0.00, -0.00) |
| Personality and behavioral disorders                                    | 0.0050 ± 0.0706 | 0.0041 ± 0.0639 | n.s.<br>(-0.00,-0.00)      |
| Developmental Disabilities                                              | 0.1122 ± 0.3156 | 0.1001 ± 0.3001 | < 0.0001<br>(-0.01,-0.01)  |
| Behavioral & emotional disorders with onset in childhood & adolescence. | 0.0595 ± 0.2365 | 0.0527 ± 0.2235 | < 0.0001<br>(-0.01, -0.01) |
